# Supplementary material
Source: HighWire-hosted journal article supplement (http://jnm-client.smart01.highwire.org/highwire/filestream/118384/field_highwire_adjunct_files/0/267014_Supplemental_Data.pdf)
Supplement: 267014_Supplemental_Data.pdf [file 267014_Supplemental_Data.pdf]

# Supplemental Data

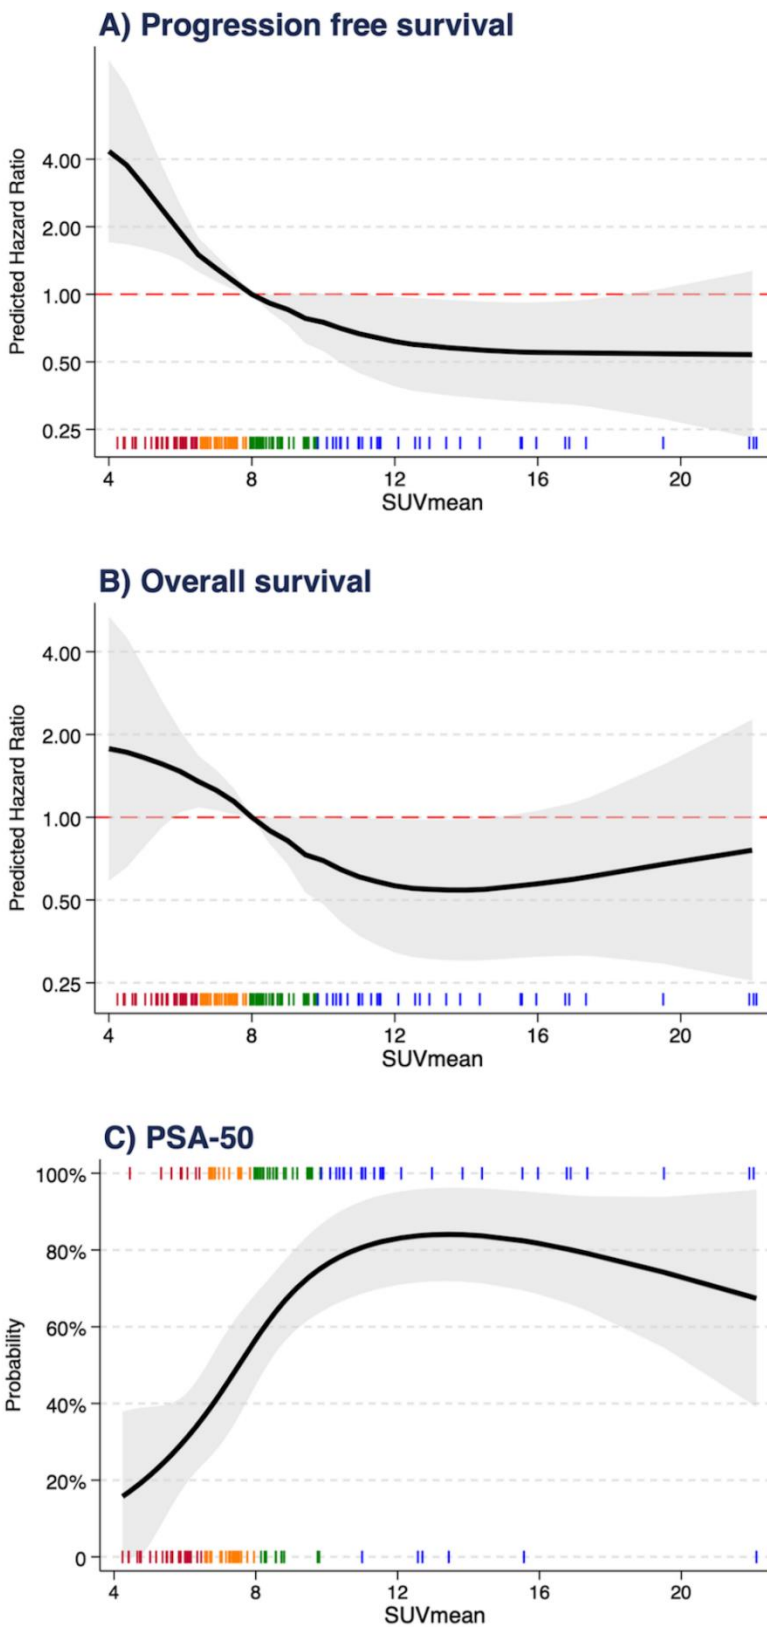

## Supplemental Figure 1.

Predicted hazard ratio of PSA-PFS (A) and OS (B) for semi-quantitative SUVmean (continuous variable). Probability of PSA50 response rate according to quantitative SUVmean (C).

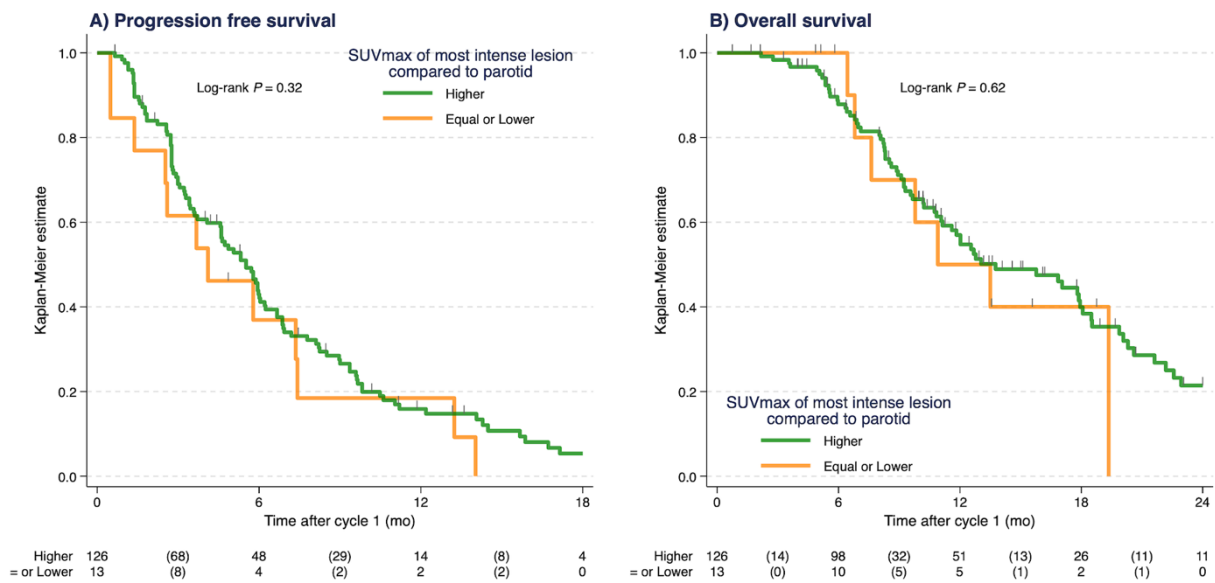

**Supplemental Figure 2.** Kaplan Meier curve (log-rank tests) of PSA-PFS (A) and OS (B) of the most intense lesion above parotid vs equal or below parotid.
